# Supplementary material for: Variety of RNAs in Peripheral Blood Cells, Plasma, and Plasma Fractions
Source: Hindawi journal article supplement (doi:10.1155/2017/7404912), 2017-01-01
Supplement: f1 [file 7404912.f1.pdf]

Table S1: Differentially distributed mtRNAs, major cellular RNAs and transcripts of genomic repeats in blood cells (I), plasma (II) and blood plasma fractions (III–V).

| Profile 1                 | Profile 2                | Transcript ID             | FPKM1 | FPKM2 | log <sub>2</sub> | q <sup>(1)</sup> |
|---------------------------|--------------------------|---------------------------|-------|-------|------------------|------------------|
| I. Blood cells            | II. Plasma               | mt-TRNP                   | 4.1E6 | 6.0E5 | -2.8             | 0.05             |
|                           | III. 16,000 g pellet     | 18S_rRNA                  | 1.3E5 | 3.5E5 | 1.4              | 0.005            |
|                           |                          | TRNI-ATC                  | 4.6E3 | 2.6E5 | 5.8              | 0.003            |
|                           |                          | 28S_rRNA <sup>(2)</sup>   | 8.4E4 | 2.4E5 | 1.5              | 0.003            |
|                           | IV. 160,000 g pellet     | U13_snRNA                 | 3.4E4 | 2.4E3 | -3.8             | 0.003            |
|                           |                          | TRNI-ATC                  | 4.6E3 | 9.5E4 | 4.4              | 0.026            |
|                           |                          | MER41A <sup>(3)</sup>     | 1.1E3 | 2.5E4 | 4.5              | 0.039            |
|                           | V. 160,000 g supernatant | mt-RNR2                   | 4.3E5 | 2.1E5 | -1.0             | 0.02             |
|                           |                          | TRNI-ATC                  | 4.6E3 | 3.6E5 | 6.3              | 0.003            |
| c_28S_rRNA <sup>(2)</sup> |                          | 3.3E3                     | 1.6E5 | 5.6   | 0.039            |                  |
| II. Plasma                | III. 16,000 g pellet     | mt-TRND                   | 2.6E5 | 3.1E6 |                  | 0.01             |
|                           |                          | 18S_rRNA                  | 1.7E5 | 3.5E5 | 1.1              | 0.003            |
|                           |                          | 28S_rRNA                  | 5.8E4 | 1.5E5 | 1.4              | 0.003            |
|                           | IV. 160,000 g pellet     | mt-D-loop                 | 8.5E2 | 7.9E3 | 3.2              | 0.01             |
|                           |                          | 28S_rRNA                  | 5.8E4 | 2.4E5 | 2.1              | 0.003            |
|                           |                          | U5A_snRNA                 | 1.7E4 | 1.1E5 | 2.6              | 0.038            |
|                           |                          | U5B_snRNA                 | 1.3E4 | 1.1E5 | 3.1              | 0.003            |
|                           |                          | U6_snRNA                  | 2.7E4 | 3.9E5 | 3.9              | 0.003            |
|                           | MER41A <sup>(3)</sup>    | 9.8E2                     | 2.5E4 | 4.7   | 0.039            |                  |
|                           | V. 160,000 g supernatant | c_28S_rRNA <sup>(2)</sup> | 6.1E3 | 1.6E5 | 4.7              | 0.049            |
| III. 16,000 g pellet      | IV. 160,000 g pellet     | U1_snRNA                  | 5.7E4 | 5.7E5 | 3.3              | 0.003            |
|                           |                          | U5A_snRNA                 | 1.3E4 | 1.1E5 | 3.1              | 0.015            |
|                           |                          | U5B_snRNA                 | 1.5E4 | 1.1E5 | 2.9              | 0.045            |
|                           |                          | 28S_rRNA                  | 1.5E5 | 5.6E4 | -1.4             | 0.003            |
|                           | V. 160,000 g supernatant | mt-RNR2                   | 6.3E5 | 2.1E5 | -1.6             | 0.01             |
|                           |                          | mt-TRND                   | 3.1E6 | 5.0E5 | -2.7             | 0.05             |
|                           |                          | c_28S_rRNA <sup>(2)</sup> | 6.4E3 | 1.6E5 | 4.6              | 0.049            |
| IV. 160,000 g pellet      | V. 160,000 g supernatant | mt-RNR2                   | 4.5E5 | 2.1E5 | -1.1             | 0.02             |
|                           |                          | 28S_rRNA                  | 2.4E5 | 5.6E4 | -2.1             | 0.003            |
|                           |                          | U1_snRNA                  | 5.7E5 | 6.8E4 | -3.1             | 0.005            |
|                           |                          | TRNW-TGG                  | 4.7E4 | 5.0E5 | 3.4              | 0.019            |
|                           |                          | c_28S_rRNA <sup>(2)</sup> | 2.3E4 | 1.6E5 | 2.8              | 0.039            |
|                           |                          | MER41A <sup>(3)</sup>     | 2.5E4 | 1.3E3 | -4.3             | 0.039            |

<sup>(1)</sup> Benjamini–Hochberg-adjusted p-values of blood fraction FPKM value comparisons (Cuffdiff).

<sup>(2)</sup> Transcripts complementary to 28S rRNA were overrepresented in blood fraction V (160,000 g supernatant).

<sup>(3)</sup> MER41A transcribed genomic repeat was overrepresented in blood fraction IV (160,000 g pellets).

Table S2: Top 10 common mitochondrial transcripts of healthy donors and NSCLC patients in cells, plasma and blood plasma fractions.

| I. Blood cells          |                     |                    |                  | II. Plasma  |       |       |      | III. 16,000 g pellet |       |       |      | IV. 160,000 g pellet |       |       |      | V. 160,000 g supernatant |       |       |      |
|-------------------------|---------------------|--------------------|------------------|-------------|-------|-------|------|----------------------|-------|-------|------|----------------------|-------|-------|------|--------------------------|-------|-------|------|
| ID <sup>(1)</sup>       | FPKM <sup>(2)</sup> | Std <sup>(2)</sup> | q <sup>(3)</sup> | ID          | FPKM  | Std   | q    | ID                   | FPKM  | Std   | q    | ID                   | FPKM  | Std   | q    | ID                       | FPKM  | Std   | q    |
| TRNV                    | 7.2E7               | 6.8E6              | 0.91             | <u>TRNM</u> | 1.2E7 | 4.8E6 | 0.55 | <u>TRNM</u>          | 1.2E8 | 1.8E8 | 0.69 | TRNS2                | 3.7E7 | 1.8E7 | 0.55 | TRNV                     | 9.9E7 | 7.1E7 | 0.65 |
| <u>TRNM</u>             | 4.2E7               | 2.1E7              | 0.57             | TRNK        | 9.4E6 | 5.5E6 | 0.53 | TRNV                 | 6.5E7 | 3.1E6 | 0.99 | <u>TRNM</u>          | 2.8E7 | 8.6E6 | 0.80 | TRNT                     | 4.9E7 | 3.7E7 | 0.51 |
| TRNT                    | 1.9E7               | 5.6E6              | 0.78             | TRNI        | 2.6E6 | 1.8E6 | 0.59 | TRNS2                | 4.7E7 | 3.6E7 | 0.69 | TRNH                 | 1.5E7 | 7.0E6 | 0.61 | <u>TRNM</u>              | 4.0E7 | 3.1E7 | 0.54 |
| TRNK                    | 1.1E7               | 8.3E6              | 0.50             | TRNE        | 2.1E6 | 9.3E5 | 0.70 | TRNH                 | 2.4E7 | 1.1E7 | 0.76 | TRNL2                | 5.6E6 | 3.3E6 | 0.51 | TRNH                     | 3.2E7 | 2.3E7 | 0.68 |
| TRNI                    | 5.1E6               | 3.0E6              | 0.51             | TRNW        | 1.6E6 | 6.7E5 | 0.60 | TRNL1                | 1.2E7 | 5.2E6 | 0.76 | TRNC                 | 4.7E6 | 1.9E6 | 0.73 | TRNK                     | 3.1E7 | 2.6E7 | 0.62 |
| TRNL2                   | 5.1E6               | 2.8E6              | 0.57             | TRNA        | 1.1E6 | 5.5E5 | 0.51 | TRNT                 | 1.2E7 | 4.0E6 | 0.81 | TRNN                 | 3.2E6 | 1.4E6 | 0.69 | TRNS2                    | 2.5E7 | 4.5E6 | 0.88 |
| TRNC                    | 3.0E6               | 3.6E5              | 0.91             | TRNP        | 6.0E5 | 1.6E5 | 0.60 | TRNK                 | 9.6E6 | 4.2E6 | 0.81 | TRNE                 | 2.6E6 | 3.7E5 | 0.96 | TRNL1                    | 1.8E7 | 1.8E7 | 0.51 |
| TRNW                    | 2.3E6               | 1.5E6              | 0.55             | RNR1        | 1.4E5 | 5.9E4 | 0.53 | TRNC                 | 5.9E6 | 4.7E6 | 0.69 | TRNI                 | 2.0E6 | 4.6E5 | 0.90 | TRNC                     | 1.2E7 | 7.6E6 | 0.51 |
| TRNF                    | 1.3E6               | 9.1E5              | 0.51             | ATP8        | 8.1E4 | 1.3E5 | 0.55 | TRNL2                | 5.6E6 | 3.9E6 | 0.81 | TRNW                 | 2.0E6 | 6.1E5 | 0.74 | TRNN                     | 1.1E7 | 3.5E6 | 0.72 |
| TRNY                    | 9.5E5               | 6.1E5              | 0.78             | ND1         | 6.2E3 | 3.6E3 | 0.51 | TRNR                 | 5.1E6 | 3.6E6 | 0.81 | TRNS1                | 1.4E6 | 6.5E5 | 0.51 | TRNQ                     | 4.2E6 | 1.9E6 | 0.72 |
| Pearson correlation (r) |                     |                    |                  |             |       |       |      |                      |       |       |      |                      |       |       |      |                          |       |       |      |
| <b>H:LSCC</b>           |                     | 0.97               |                  | 0.93        |       | 0.90  |      | 0.93                 |       | 0.80  |      |                      |       |       |      |                          |       |       |      |
| <b>H:LAC</b>            |                     | 0.86               |                  | 0.73        |       | 0.41  |      | 0.98                 |       | 0.47  |      |                      |       |       |      |                          |       |       |      |
| <b>LSCC:LAC</b>         |                     | 0.90               |                  | 0.86        |       | 0.41  |      | 0.85                 |       | 0.48  |      |                      |       |       |      |                          |       |       |      |

<sup>(1)</sup> Gene IDs, according to the NCBI reference sequence NC\_012920.1 (*Homo sapiens* mitochondrion genome, revised Cambridge reference sequence).

Genes were selected as the overlapping top 10 results of the Cuffdiff comparison with minimal p-values (Cuffdiff).

<sup>(2)</sup> Mean FPKM values and standard deviation (Std) of mean FPKM values of all individual samples (obtained from healthy donors, lung adenocarcinoma and lung squamous cell carcinoma patients) for each blood fraction. Data are sorted in descending order by mean FPKM values within each blood fraction block.

<sup>(3)</sup> Minimal q-values as Benjamini–Hochberg-adjusted p-values of FPKM comparisons of healthy donor, lung adenocarcinoma and lung squamous cell carcinoma patient blood samples (Cuffdiff).

Table S3: Transcribed genomic repeats, fragments of which are commonly represented in human blood fractions of healthy donors and NSCLC patients.

| Fraction            | I. Blood cells   |                                                | II. Plasma |                                               | III. 16,000 g pellet |                                      | IV. 160,000 g pellet |                                         | V. 160,000 g supernatant |                                       |
|---------------------|------------------|------------------------------------------------|------------|-----------------------------------------------|----------------------|--------------------------------------|----------------------|-----------------------------------------|--------------------------|---------------------------------------|
| Representatives     |                  |                                                |            |                                               |                      |                                      |                      |                                         |                          |                                       |
| LINE                | 8 <sup>(1)</sup> | L1PB2, L1MA10, L1MA4A, L1MA9, L1MB1, L1ME3A    | 14         | L1, L1HS, L1M3A, L1M3DE, L1MD2, L1PA14, L1PA2 | 10                   | L1, L1M1, L1M3A, L1ME4, L1ME, L1PA14 | 11                   | L1, L1M2C, L1MA4, L1MA4A, L1MA5, L1ME4A | 14                       | L1, L1M3B, L1MA9, L1ME3, L1PA7, L1MB1 |
| SINE <sup>(2)</sup> | 1                | FAM                                            | 0          | --                                            | 0                    | --                                   | 2                    | AluYb3a2, AluYbc3a                      | 1                        | FAM                                   |
| LTR                 | 6                | MLT1A2, LTR5, MER11B, MER11C, MLT2A1, MLT2B2   | 4          | LTR10A, MER21A, MSTB, THE1A                   | 9                    | MER39B, MLT1E, MER4B, MLT2B3, THE1A  | 4                    | LTR7, MLT1, MLT1A2, THE1-INTERNAL       | 0                        | -                                     |
| DNA                 | 1                | Tigger4a                                       | 0          | --                                            | 0                    | --                                   | 3                    | Tigger1, Tigger3b, Tigger2              | 2                        | Tigger3b, Tigger2                     |
| Satellite           | 0                | --                                             | 0          | --                                            | 0                    | --                                   | 0                    | --                                      | 1                        | ALR10                                 |
| Others              | 4                | c_U2-2 <sup>(3)</sup> , c_TRNA, c_TRNV, c_TRNK | 2          | c_TRNY, c_5.8S_rRNA                           | 1                    | c_HY3_scrRNA                         | 0                    | --                                      | 2                        | c_TRNP, c_tRNW                        |

<sup>(1)</sup> Number of repeats in the list of the top 20 most invariable RNA species (Cuffdiff  $p > 0.68$ , Benjamini–Hochberg-adjusted  $p$ -values  $q > 0.84$ ).

<sup>(2)</sup> SINE genomic repeats include Alu, FAM, FLAM and FRAM consensus sequences (GIRI RepBase) and 7SL scRNA reference sequence (NR\_002715).

<sup>(3)</sup> Referenced sequences are complementary to major cellular RNAs – rRNAs, tRNAs, U1–U12 snRNAs, 7SK RNA and hY1–hY5 scRNAs.

Table S4: Top 10 major cellular RNA species (rRNAs, tRNAs, U1–U6, U12 and U17 snRNA, Y scRNAs and 7SK RNA) common for the human blood fractions of healthy donors and NSCLC patients.

| I. Blood cells                   |                     |                    |                  | II. Plasma |       |       |      | III. 16,000 g pellet |       |       |      | IV. 160,000 g pellet |       |       |      | V. 160,000 g supernatant |       |       |      |
|----------------------------------|---------------------|--------------------|------------------|------------|-------|-------|------|----------------------|-------|-------|------|----------------------|-------|-------|------|--------------------------|-------|-------|------|
| ID <sup>(1)</sup>                | FPKM <sup>(2)</sup> | Std <sup>(2)</sup> | q <sup>(3)</sup> | ID         | FPKM  | Std   | q    | ID                   | FPKM  | Std   | q    | ID                   | FPKM  | Std   | q    | ID                       | FPKM  | Std   | q    |
| 5S                               | 1.3E7               | 5.5E6              | 0.76             | TRNV       | 5.5E6 | 2.3E6 | 0.85 | HY4                  | 3.8E7 | 1.7E7 | 0.76 | TRNQ                 | 4.8E5 | 2.6E4 | 0.94 | TRND                     | 1.4E7 | 5.0E6 | 0.74 |
| HY4                              | 1.2E7               | 2.8E6              | 0.87             | 5S         | 5.1E6 | 2.3E6 | 0.77 | TRNG                 | 1.5E6 | 4.9E5 | 0.73 | TRNG                 | 4.3E5 | 6.6E4 | 0.85 | TRNK                     | 3.9E6 | 1.3E6 | 0.73 |
| TRNV <sup>(4)</sup>              | 2.6E6               | 1.1E6              | 0.71             | TRNG       | 1.9E6 | 6.7E5 | 0.88 | HYS                  | 1.0E6 | 3.5E5 | 0.73 | TRNR                 | 1.7E5 | 2.1E4 | 0.88 | HYS                      | 3.7E6 | 1.0E6 | 0.75 |
| TRNQ                             | 1.3E6               | 7.0E5              | 0.71             | HYS        | 1.7E6 | 8.4E5 | 0.77 | TRNV                 | 6.6E5 | 2.2E5 | 0.76 | TRNM                 | 1.1E5 | 2.5E4 | 0.80 | TRNG                     | 2.8E6 | 2.7E5 | 0.94 |
| TRNR                             | 4.7E5               | 2.5E5              | 0.71             | 5.8S       | 1.3E6 | 5.1E5 | 0.85 | TRNM                 | 1.9E5 | 5.5E4 | 0.81 | TRNT                 | 1.0E5 | 1.6E4 | 0.85 | TRNQ                     | 1.3E6 | 4.0E5 | 0.73 |
| TRNT                             | 2.5E5               | 8.3E4              | 0.83             | TRNI       | 3.8E5 | 1.5E5 | 0.85 | TRNR                 | 1.5E5 | 3.2E4 | 0.85 | 18S                  | 7.7E4 | 1.8E4 | 0.85 | TRNM                     | 8.5E5 | 1.8E4 | 0.98 |
| TRNM                             | 2.1E5               | 1.1E5              | 0.72             | TRNP       | 2.0E5 | 6.4E4 | 0.83 | TRNT                 | 1.4E5 | 4.5E4 | 0.78 | TRNA                 | 7.6E4 | 2.1E4 | 0.72 | TRNI                     | 8.0E5 | 4.5E5 | 0.72 |
| U6                               | 1.4E5               | 4.1E4              | 0.83             | TRNW       | 1.9E5 | 2.2E4 | 0.95 | TRNW                 | 4.9E4 | 2.2E4 | 0.73 | TRNN                 | 3.3E4 | 4.7E3 | 0.85 | U1                       | 1.4E5 | 6.8E4 | 0.72 |
| TRNW                             | 1.3E5               | 9.3E4              | 0.71             | TRNR       | 5.6E4 | 5.3E3 | 0.97 | TRNL                 | 4.3E4 | 3.5E4 | 0.73 | U5E                  | 7.5E3 | 2.1E3 | 0.70 | U2                       | 9.9E4 | 3.9E4 | 0.73 |
| TRNP                             | 7.2E4               | 1.1E4              | 0.92             | TRNY       | 4.6E4 | 1.7E4 | 0.80 | U2                   | 1.6E4 | 7.6E3 | 0.76 | 7SK                  | 3.3E2 | 9.9E0 | 0.96 | U5F                      | 1.6E3 | 7.9E2 | 0.73 |
| Pearson correlation ( <i>r</i> ) |                     |                    |                  |            |       |       |      |                      |       |       |      |                      |       |       |      |                          |       |       |      |
| H:LSCC                           | 0.93                |                    |                  | 0.87       |       |       | 1.00 |                      |       | 0.96  |      |                      | 0.94  |       |      |                          |       |       |      |
| H:LAC                            | 0.96                |                    |                  | 0.98       |       |       | 1.00 |                      |       | 0.99  |      |                      | 0.93  |       |      |                          |       |       |      |
| LSCC:LAC                         | 0.80                |                    |                  | 0.93       |       |       | 1.00 |                      |       | 0.95  |      |                      | 0.99  |       |      |                          |       |       |      |

<sup>(1)</sup> RNAs selected as the top maximal FPKM values, filtered with cut-off  $q < 0.7$ , in the three Cuffdiff comparisons of particular fractions of the blood of healthy donors (H), lung adenocarcinoma (LAC) and lung squamous cell carcinoma (LSCC) patients.

<sup>(2)</sup> Mean FPKM values and standard deviation (Std) of mean FPKM values of blood samples obtained from healthy donors, lung adenocarcinoma and lung squamous cell carcinoma patients. Data are sorted in descending order by FPKM values within each blood fraction block.

<sup>(3)</sup> Minimal q-values as Benjamini–Hochberg-adjusted p-values of FPKM comparisons of healthy donor, lung adenocarcinoma and lung squamous cell carcinoma patient blood samples (Cuffdiff).

<sup>(4)</sup> Within tRNA isoforms the most representative isoform is shown.

Table S5: Top 10 mRNAs commonly represented in human blood fractions of healthy donors and NSCLC patients.

| I. Blood cells                        |                     |                    |                  | II. Plasma          |       |       |      | III. 16,000 g pellet |       |       |      | IV. 160,000 g pellet |       |       |      | V. 160,000 g supernatant |       |       |      |
|---------------------------------------|---------------------|--------------------|------------------|---------------------|-------|-------|------|----------------------|-------|-------|------|----------------------|-------|-------|------|--------------------------|-------|-------|------|
| ID <sup>(1)</sup>                     | FPKM <sup>(2)</sup> | Std <sup>(2)</sup> | q <sup>(3)</sup> | ID                  | FPKM  | Std   | q    | ID                   | FPKM  | Std   | q    | ID                   | FPKM  | Std   | q    | ID                       | FPKM  | Std   | q    |
| <u>PRKCH</u> <sup>(4)</sup>           | 1.5E3               | 1.4E3              | 0.55             | <u>PRKCH</u>        | 1.6E2 | 3.9E1 | 0.64 | <u>PRKCH</u>         | 8.2E2 | 7.9E2 | 0.59 | <u>CLIC2</u>         | 5.0E2 | 3.3E2 | 0.51 | TRIM41                   | 7.1E2 | 9.1E2 | 0.56 |
| ABCG1                                 | 9.1E1               | 2.6E1              | 0.72             | TIGD6               | 7.9E1 | 6.2E1 | 0.50 | <u>HLA-A</u>         | 2.9E1 | 3.8E0 | 0.71 | MDH1                 | 4.4E2 | 3.2E2 | 0.56 | <u>PRKCH</u>             | 4.1E2 | 4.2E2 | 0.55 |
| KLRC4                                 | 6.7E1               | 1.3E1              | 0.59             | OAZ1                | 4.3E1 | 1.1E1 | 0.54 | PIP4K2A              | 2.6E1 | 8.1E0 | 0.66 | RPL10L               | 4.1E2 | 1.8E2 | 0.57 | ZNF367                   | 4.1E2 | 2.1E2 | 0.65 |
| <u>CLIC2</u>                          | 6.2E1               | 2.1E1              | 0.66             | <u>HLA-E</u>        | 3.2E1 | 8.1E0 | 0.66 | CALCR                | 2.6E1 | 8.2E0 | 0.51 | TMEFF2               | 3.0E2 | 1.7E2 | 0.55 | UQCRQ                    | 1.2E2 | 3.6E1 | 0.70 |
| RPL39                                 | 6.0E1               | 1.1E1              | 0.56             | CHN2 <sup>(5)</sup> | 2.8E1 | 9.0E0 | 0.51 | PCMTD1               | 2.5E1 | 6.2E0 | 0.63 | PPP1R15B             | 2.8E2 | 1.3E2 | 0.72 | C19orf24                 | 7.1E1 | 1.8E1 | 0.55 |
| NR1H3 <sup>(5)</sup>                  | 5.9E1               | 1.7E1              | 0.57             | F13A1               | 2.7E1 | 9.6E0 | 0.53 | ARPC2                | 2.4E1 | 4.9E0 | 0.57 | CHRN3                | 2.8E2 | 1.2E2 | 0.58 | ZFR2                     | 6.8E1 | 4.1E1 | 0.51 |
| ZNF131                                | 5.5E1               | 1.2E1              | 0.64             | EIF1                | 2.7E1 | 4.6E0 | 0.61 | FOXR1                | 2.2E1 | 3.9E0 | 0.53 | C9orf100             | 1.9E2 | 9.9E1 | 0.57 | OBSCN                    | 6.7E1 | 3.6E1 | 0.66 |
| CCNDBP1                               | 5.4E1               | 1.8E1              | 0.57             | HIST1H4H            | 2.5E1 | 2.4E0 | 0.84 | HIST1H2BI            | 2.1E1 | 2.8E0 | 0.71 | NCOA3                | 1.7E2 | 6.2E1 | 0.69 | LRRC56                   | 5.9E1 | 5.0E0 | 0.92 |
| <u>HLA-A</u>                          | 4.8E1               | 1.2E1              | 0.60             | ZNF212              | 2.4E1 | 4.1E0 | 0.74 | HIST1H2BD            | 1.9E1 | 3.5E0 | 0.60 | <u>UCHL3</u>         | 1.5E2 | 4.8E1 | 0.52 | HS3ST6                   | 5.1E1 | 1.6E1 | 0.50 |
| <u>HLA-E</u>                          | 4.6E1               | 2.0E1              | 0.51             | <u>UCHL3</u>        | 2.3E1 | 3.9E0 | 0.59 | IGFL3                | 1.9E1 | 3.7E0 | 0.55 | NHP2                 | 1.4E2 | 1.9E1 | 0.74 | MARVELD3                 | 4.7E1 | 2.0E1 | 0.55 |
| <b>Pearson correlation (<i>r</i>)</b> |                     |                    |                  |                     |       |       |      |                      |       |       |      |                      |       |       |      |                          |       |       |      |
| H:LSCC                                | 0.97                |                    |                  | 0.97                |       |       |      | 1.00                 |       |       |      | 0.56                 |       |       |      | 0.55                     |       |       |      |
| H:LAC                                 | 0.96                |                    |                  | 0.75                |       |       |      | 1.00                 |       |       |      | 0.55                 |       |       |      | 0.19                     |       |       |      |
| LSCC:LAC                              | 1.00                |                    |                  | 0.77                |       |       |      | 1.00                 |       |       |      | 0.55                 |       |       |      | 0.28                     |       |       |      |

- <sup>(1)</sup> mRNAs selected as the top 10 by the mean FPKM value within a particular blood fraction.
- <sup>(2)</sup> Mean FPKM values and standard deviation (Std) of mean FPKM values of blood samples obtained from healthy donors, lung adenocarcinoma and lung squamous cell carcinoma patients. Data are sorted in descending order by mean FPKM within each blood fraction block.
- <sup>(3)</sup> Minimal q-values as Benjamini–Hochberg-adjusted p-values of FPKM comparisons of healthy donor, lung adenocarcinoma and lung squamous cell carcinoma patient blood samples (Cuffdiff).
- <sup>(4)</sup> Underlined mRNAs were detected in the top 10 of two or more blood fractions.
- <sup>(5)</sup> For the splice isoforms of the gene the most representative isoform was selected by FPKM value.

Table S6: RefSeq lncRNAs (NR transcripts > 200 nt) of human blood fractions of healthy donors and NSCLC patients.

| NR                              | ID <sup>(1)</sup> | FPKM <sup>(2)</sup> | Std <sup>(2)</sup> | q <sup>(3)</sup> |
|---------------------------------|-------------------|---------------------|--------------------|------------------|
| <b>I. Blood cells</b>           |                   |                     |                    |                  |
| NR_003365                       | SUGT1P3           | 2.6E2               | 1.2E2              | 0.50             |
| NR_027513                       | CCNDBP1           | 5.6E1               | 1.9E1              | 0.59             |
| NR_027487                       | LOC146880         | 2.3E1               | 5.8E0              | 0.57             |
| NR_001434                       | HLA-H             | 2.2E1               | 2.5E0              | 0.76             |
| <b>II. Plasma</b>               |                   |                     |                    |                  |
| NR_003008                       | SCARNA5           | 5.2E1               | 3.3E0              | 0.89             |
| NR_003674                       | KGFLP1            | 1.9E1               | 3.2E0              | 0.73             |
| <b>III. 16,000 g pellet</b>     |                   |                     |                    |                  |
| NR_024058                       | YWHAE             | 3.7E1               | 8.6E0              | 0.56             |
| <b>IV. 160,000 g pellet</b>     |                   |                     |                    |                  |
| NR_003051                       | RMRP              | 3.6E3               | 8.7E2              | 0.82             |
| NR_002312                       | RPPH1             | 3.0E3               | 1.5E3              | 0.52             |
| NR_015376                       | NCRNA00200        | 5.3E2               | 3.9E2              | 0.53             |
| NR_027336                       | LOC100130015      | 4.9E1               | 1.0E1              | 0.66             |
| NR_003034                       | LOC441601         | 4.6E1               | 9.4E-01            | 0.95             |
| NR_027232                       | NCRNA00107        | 4.5E1               | 1.1E1              | 0.52             |
| NR_001593                       | RPL18AP3          | 4.3E1               | 5.1E-01            | 0.97             |
| NR_001560                       | CYCSP52           | 4.3E1               | 7.2E0              | 0.65             |
| NR_003586                       | EEF1A1P9          | 4.3E1               | 9.7E0              | 0.58             |
| NR_033902                       | KIAA1967          | 3.2E1               | 1.1E1              | 0.55             |
| NR_003003                       | SCARNA17          | 3.1E1               | 6.5E0              | 0.54             |
| NR_024391                       | LOC647946         | 3.1E1               | 8.2E0              | 0.55             |
| NR_026877                       | MGC2889           | 3.1E1               | 6.0E0              | 0.64             |
| NR_024444                       | LOC100133985      | 2.8E1               | 2.4E0              | 0.77             |
| NR_029455                       | LOC440335         | 2.7E1               | 6.3E0              | 0.52             |
| NR_027322                       | LOC283070         | 2.5E1               | 1.8E0              | 0.85             |
| NR_027097                       | LOC100271832      | 2.4E1               | 9.5E-01            | 0.89             |
| NR_034140                       | C12orf33          | 2.2E1               | 3.7E0              | 0.63             |
| NR_024531                       | RPL23AP7          | 2.2E1               | 1.9E0              | 0.81             |
| NR_026911                       | RPL21P28          | 2.1E1               | 4.4E0              | 0.52             |
| <b>V. 160,000 g supernatant</b> |                   |                     |                    |                  |
| NR_003674                       | KGFLP1            | 2.7E1               | 2.8E0              | 0.86             |
| NR_033425                       | TSLP              | 2.5E1               | 4.8E0              | 0.68             |
| NR_003670                       | KGFLP2            | 2.2E1               | 2.0E0              | 0.90             |
| NR_024020                       | NOL8              | 2.0E1               | 9.9E0              | 0.52             |
| NR_033370                       | LOC63930          | 1.9E1               | 1.6E0              | 0.88             |
| NR_003505                       | PPP4R1L           | 1.8E1               | 4.4E0              | 0.59             |
| NR_034010                       | SNHG8             | 1.5E1               | 2.8E0              | 0.63             |
| NR_033789                       | SPRNP1            | 1.3E1               | 2.5E0              | 0.57             |
| NR_024618                       | LOC100129550      | 1.2E1               | 2.0E0              | 0.75             |
| NR_026877                       | MGC2889           | 1.2E1               | 2.4E0              | 0.56             |
| NR_024567                       | LOC100130557      | 1.2E1               | 3.0E0              | 0.52             |
| NR_026863                       | C21orf84          | 1.2E1               | 2.9E0              | 0.51             |
| NR_002837                       | UBE2MP1           | 1.1E1               | 2.3E0              | 0.55             |

<sup>(1)</sup> NCBI RefSeq NR-annotated lncRNAs selected as the top 20 by mean FPKM value within a particular blood fraction.

<sup>(2)</sup> Mean FPKM values and standard deviation (Std) of mean FPKM values in the array of sequencing reads of blood samples obtained from healthy donors, lung adenocarcinoma and lung squamous cell carcinoma patients. Data are sorted in descending order by mean FPKM within each blood fraction block.

<sup>(3)</sup> Minimal q-values as Benjamini–Hochberg-adjusted p-values of FPKM comparisons of healthy donor, lung adenocarcinoma and lung squamous cell carcinoma patient blood samples (Cuffdiff).

Table S7: Common microRNAs of human blood fractions of healthy donors and NSCLC patients.

| I. Blood cells                 |                     |                    |                  | II. Plasma      |       |       |      | III. 16,000 g pellet |       |       |      | IV. 160,000 g pellet |       |       |      | V. 160,000 g supernatant |       |       |      |
|--------------------------------|---------------------|--------------------|------------------|-----------------|-------|-------|------|----------------------|-------|-------|------|----------------------|-------|-------|------|--------------------------|-------|-------|------|
| ID <sup>(1)</sup>              | FPKM <sup>(2)</sup> | Std <sup>(2)</sup> | q <sup>(3)</sup> | ID              | FPKM  | Std   | q    | ID                   | FPKM  | Std   | q    | ID                   | FPKM  | Std   | q    | ID                       | FPKM  | Std   | q    |
| <u>MIR451</u> <sup>(4)</sup>   | 9.8E7               | 1.6E8              | 0.35             | <u>MIR16-2</u>  | 6.3E5 | 7.5E5 | 0.34 | <u>MIR103-1</u>      | 5.9E6 | 6.4E6 | 0.55 | <u>MIR451</u>        | 1.2E7 | 1.7E7 | 0.39 | <u>MIR451</u>            | 7.7E7 | 1.2E8 | 0.34 |
| <u>MIR16-1</u>                 | 5.2E6               | 6.7E6              | 0.33             | <u>MIR103-1</u> | 5.8E5 | 2.6E5 | 0.68 | <u>MIR103-2</u>      | 5.9E6 | 6.4E6 | 0.55 | <u>MIR103-1</u>      | 4.2E5 | 2.5E5 | 0.37 | <u>MIR103-1</u>          | 1.1E6 | 9.3E5 | 0.36 |
| <u>MIR16-2</u>                 | 4.5E6               | 4.9E6              | 0.35             | <u>MIR103-2</u> | 5.7E5 | 2.6E5 | 0.68 | <u>MIR126</u>        | 1.2E6 | 1.7E6 | 0.45 | <u>MIR103-2</u>      | 4.2E5 | 2.5E5 | 0.37 | <u>MIR103-2</u>          | 1.1E6 | 9.2E5 | 0.36 |
| <u>MIR103-2</u>                | 3.8E6               | 2.9E6              | 0.66             | <u>MIR16-1</u>  | 5.0E5 | 4.9E5 | 0.34 | MIR26A1              | 7.9E5 | 1.1E6 | 0.34 | <u>MIR223</u>        | 3.1E5 | 1.7E5 | 0.63 | <u>MIR223</u>            | 1.0E6 | 1.2E6 | 0.35 |
| <u>MIR103-1</u>                | 3.8E6               | 2.9E6              | 0.66             | <u>MIR223</u>   | 2.6E5 | 2.2E5 | 0.63 | MIR26A2              | 6.1E5 | 8.7E5 | 0.34 | <u>MIR126</u>        | 2.1E5 | 9.6E4 | 0.43 | <u>MIR16-1</u>           | 1.0E6 | 1.1E6 | 0.35 |
| <u>MIR126</u>                  | 1.4E6               | 1.1E6              | 0.51             | <u>MIR107</u>   | 1.2E5 | 1.1E5 | 0.33 | MIR24-1              | 5.7E5 | 6.7E5 | 0.36 | MIR425               | 3.7E4 | 1.5E4 | 0.45 | <u>MIR16-2</u>           | 9.1E5 | 1.1E6 | 0.35 |
| MIR144                         | 1.2E6               | 2.0E6              | 0.34             | MIR140          | 1.1E5 | 1.4E5 | 0.35 | <u>MIR107</u>        | 5.4E5 | 6.6E5 | 0.33 | MIR122               | 2.3E4 | 8.9E3 | 0.33 | <u>MIR126</u>            | 5.2E5 | 4.4E5 | 0.37 |
| MIR486                         | 7.3E5               | 6.7E5              | 0.45             | MIR191          | 9.8E4 | 1.1E5 | 0.35 | MIRLET7F2            | 4.8E5 | 4.2E5 | 0.34 | MIR130B              | 6.2E3 | 1.2E3 | 0.52 | MIR19B1                  | 2.6E5 | 2.6E5 | 0.34 |
| MIR19A                         | 7.2E5               | 1.2E6              | 0.35             | MIR20B          | 1.1E4 | 1.1E4 | 0.32 | MIR21                | 3.0E5 | 2.1E5 | 0.54 | MIR197               | 5.1E3 | 1.4E3 | 0.47 | MIR101-1                 | 4.1E4 | 3.6E4 | 0.31 |
| <u>MIR107</u>                  | 5.0E5               | 4.5E5              | 0.46             | MIR23B          | 1.0E4 | 2.8E3 | 0.39 | MIR24-2              | 2.8E5 | 3.3E5 | 0.35 | MIR30E               | 4.8E3 | 1.4E3 | 0.33 | MIR106B                  | 3.9E4 | 4.2E4 | 0.31 |
| MIR17                          | 4.0E5               | 6.2E5              | 0.34             | MIR320C1        | 3.1E3 | 2.7E3 | 0.30 | MIR142               | 2.7E5 | 4.1E5 | 0.33 | MIR551B              | 1.9E3 | 1.9E2 | 0.77 | MIR101-2                 | 3.5E4 | 3.1E4 | 0.31 |
| <u>MIR223</u>                  | 3.9E5               | 4.8E5              | 0.39             | MIR146A         | 2.9E3 | 8.3E2 | 0.42 | MIR23A               | 2.7E5 | 2.6E5 | 0.38 |                      |       |       |      | MIR221                   | 2.2E4 | 2.4E4 | 0.35 |
| MIR185                         | 3.3E5               | 3.2E5              | 0.34             | MIR199B         | 1.5E3 | 3.2E2 | 0.59 | MIRLET7F1            | 2.6E5 | 2.4E5 | 0.32 |                      |       |       |      | MIRLET7I                 | 1.4E4 | 1.3E4 | 0.33 |
| MIR142                         | 2.7E5               | 2.6E5              | 0.33             | MIR766          | 1.1E3 | 5.4E2 | 0.31 | MIR17                | 2.0E5 | 2.9E5 | 0.31 |                      |       |       |      | MIR106A                  | 7.1E3 | 6.6E3 | 0.33 |
| MIR29B2                        | 2.5E5               | 3.9E5              | 0.31             | MIR320B2        | 5.1E2 | 2.3E2 | 0.36 | MIR425               | 1.7E5 | 2.4E5 | 0.33 |                      |       |       |      | MIR194-1                 | 4.3E3 | 3.7E3 | 0.35 |
| MIR29B1                        | 2.4E5               | 3.8E5              | 0.31             |                 |       |       |      | MIR130A              | 1.6E5 | 2.3E5 | 0.31 |                      |       |       |      | MIR96                    | 2.9E3 | 2.7E3 | 0.31 |
| MIR130A                        | 1.9E5               | 3.1E5              | 0.32             |                 |       |       |      | MIR19B1              | 1.6E5 | 2.1E5 | 0.34 |                      |       |       |      | MIR744                   | 1.4E3 | 1.2E3 | 0.31 |
| MIR320A                        | 3.6E4               | 1.1E4              | 0.53             |                 |       |       |      | MIR23B               | 1.4E5 | 1.6E5 | 0.35 |                      |       |       |      | MIR148B                  | 1.2E3 | 1.0E3 | 0.31 |
| MIR339                         | 8.1E3               | 7.2E3              | 0.33             |                 |       |       |      | MIR192               | 3.7E4 | 6.1E4 | 0.30 |                      |       |       |      |                          |       |       |      |
| MIR145                         | 2.7E3               | 2.3E3              | 0.33             |                 |       |       |      |                      |       |       |      |                      |       |       |      |                          |       |       |      |
| MIR326                         | 1.4E3               | 2.1E2              | 0.67             |                 |       |       |      |                      |       |       |      |                      |       |       |      |                          |       |       |      |
| <b>Pearson correlation (r)</b> |                     |                    |                  |                 |       |       |      |                      |       |       |      |                      |       |       |      |                          |       |       |      |
| H:LSCC                         | 0.68                |                    |                  | 0.68            |       |       |      | 0.73                 |       |       |      | 0.98                 |       |       |      | 0.99                     |       |       |      |
| H:LAC                          | 0.94                |                    |                  | 0.91            |       |       |      | 0.76                 |       |       |      | 0.96                 |       |       |      | 0.99                     |       |       |      |
| LSCC:LAC                       | 0.72                |                    |                  | 0.47            |       |       |      | 0.99                 |       |       |      | 0.99                 |       |       |      | 0.97                     |       |       |      |

- (1) List of microRNAs filtered with Cuffdiff q-value > 0.3 and total number of sequencing reads > 50 within a particular blood fraction.
- (2) Mean FPKM values and standard deviation (Std) of mean FPKM values of blood samples obtained from healthy donors, lung adenocarcinoma and lung squamous cell carcinoma patients. Data are sorted in descending order by mean FPKM within each blood fraction block.
- (3) Minimal q-values as Benjamini–Hochberg-adjusted p-values of FPKM comparisons of healthy donor, lung adenocarcinoma and lung squamous cell carcinoma patient blood samples (Cuffdiff).
- (4) Underlined microRNAs were detected in the top of at least three blood fractions.

Table S8: Top invariable box C/D and box H/ACA snoRNAs of human blood fractions.

| I. Blood cells                 |                     |                    |                  | II. Plasma |       |       |      | III. 16,000 g pellet |       |       |      | IV. 160,000 g pellet |       |       |      | V. 160,000 g supernatant |       |       |      |
|--------------------------------|---------------------|--------------------|------------------|------------|-------|-------|------|----------------------|-------|-------|------|----------------------|-------|-------|------|--------------------------|-------|-------|------|
| ID <sup>(1)</sup>              | FPKM <sup>(2)</sup> | Std <sup>(2)</sup> | q <sup>(3)</sup> | ID         | FPKM  | Std   | q    | ID                   | FPKM  | Std   | q    | ID                   | FPKM  | Std   | q    | ID                       | FPKM  | Std   | q    |
| SNORD34                        | 1.3E6               | 2.2E6              | 0.34             | SNORD84    | 2.8E4 | 1.3E4 | 0.32 | SNORD33              | 5.1E3 | 4.5E3 | 0.31 | SNORD84              | 5.3E4 | 3.1E4 | 0.35 | SNORD31                  | 3.7E5 | 6.0E5 | 0.36 |
| SNORD27                        | 5.1E5               | 8.6E5              | 0.33             | SNORD80    | 1.2E4 | 1.0E4 | 0.30 | SNORA14B             | 5.7E2 | 1.9E2 | 0.42 | SNORD38A             | 2.9E4 | 1.9E3 | 0.84 | SNORD25                  | 2.5E5 | 4.4E5 | 0.35 |
| SNORD84 <sup>(4)</sup>         | 2.9E5               | 1.3E5              | 0.44             | SNORD32A   | 7.6E3 | 6.6E3 | 0.33 |                      |       |       |      | SNORD100             | 1.8E4 | 1.9E3 | 0.77 | SNORD27                  | 2.2E5 | 3.8E5 | 0.35 |
| SNORD46                        | 1.5E4               | 1.4E4              | 0.33             | SNORD21    | 2.3E3 | 1.1E3 | 0.35 |                      |       |       |      | SNORD34              | 1.8E4 | 5.7E3 | 0.55 | SNORD22                  | 1.1E4 | 1.0E4 | 0.34 |
| SNORA54                        | 6.7E3               | 6.2E3              | 0.33             | SNORD15A   | 8.0E2 | 1.2E2 | 0.66 |                      |       |       |      | SNORD22              | 1.2E4 | 4.5E3 | 0.34 | SNORD67                  | 1.3E3 | 2.7E2 | 0.54 |
| SNORD114                       | 4.8E3               | 8.2E2              | 0.57             | SNORA75    | 6.8E2 | 1.1E2 | 0.73 |                      |       |       |      | SNORD104             | 8.3E3 | 3.8E3 | 0.39 | SNORD94                  | 1.2E3 | 3.3E2 | 0.39 |
| SNORA61                        | 2.9E3               | 2.6E3              | 0.33             |            |       |       |      |                      |       |       |      | SNORD29              | 5.4E3 | 8.1E2 | 0.74 | SNORA14A                 | 4.0E2 | 8.7E1 | 0.73 |
| SNORA19                        | 2.6E3               | 6.2E2              | 0.40             |            |       |       |      |                      |       |       |      | SNORD38B             | 4.3E3 | 1.0E3 | 0.56 | SNORD15A                 | 2.2E2 | 1.3E2 | 0.30 |
| SNORA62                        | 2.0E3               | 1.9E3              | 0.33             |            |       |       |      |                      |       |       |      | SNORD35A             | 2.3E3 | 4.1E2 | 0.63 |                          |       |       |      |
| SNORA52                        | 1.8E3               | 1.5E3              | 0.33             |            |       |       |      |                      |       |       |      | SNORA63              | 1.2E3 | 4.0E2 | 0.37 |                          |       |       |      |
| SNORA9                         | 7.3E2               | 6.2E2              | 0.33             |            |       |       |      |                      |       |       |      | SNORD67              | 9.8E2 | 3.7E2 | 0.32 |                          |       |       |      |
|                                |                     |                    |                  |            |       |       |      |                      |       |       |      | SNORA17              | 4.7E2 | 1.9E2 | 0.30 |                          |       |       |      |
|                                |                     |                    |                  |            |       |       |      |                      |       |       |      | SNORA48              | 4.6E2 | 1.3E2 | 0.51 |                          |       |       |      |
|                                |                     |                    |                  |            |       |       |      |                      |       |       |      | SNORA71A             | 4.4E2 | 1.2E2 | 0.63 |                          |       |       |      |
|                                |                     |                    |                  |            |       |       |      |                      |       |       |      | SNORA57              | 3.5E2 | 1.8E2 | 0.34 |                          |       |       |      |
|                                |                     |                    |                  |            |       |       |      |                      |       |       |      | SNORA6               | 3.3E2 | 1.2E2 | 0.35 |                          |       |       |      |
|                                |                     |                    |                  |            |       |       |      |                      |       |       |      | SNORA53              | 5.6E1 | 1.7E1 | 0.44 |                          |       |       |      |
| <b>Pearson correlation (r)</b> |                     |                    |                  |            |       |       |      |                      |       |       |      |                      |       |       |      |                          |       |       |      |
| H:LSCC                         | 1.00                |                    |                  | 0.53       |       |       |      | --                   |       |       |      | 0.98                 |       |       |      | 0.65                     |       |       |      |
| H:LAC                          | 1.00                |                    |                  | 0.83       |       |       |      | --                   |       |       |      | 0.96                 |       |       |      | 0.85                     |       |       |      |
| LSCC:LAC                       | 0.99                |                    |                  | 0.91       |       |       |      | --                   |       |       |      | 0.99                 |       |       |      | 0.94                     |       |       |      |

<sup>(1)</sup> snoRNAs selected as the top 20 by mean FPKM value, filtered with minimal  $q > 0.4$ , within a particular blood fraction. Selected snoRNAs were represented by more than 100 reads in each cDNA library.

<sup>(2)</sup> Mean FPKM values and standard deviation (Std) of mean FPKM values of blood samples obtained from healthy donors, lung adenocarcinoma and lung squamous cell carcinoma patients. Data are sorted in descending order by mean FPKM within each blood fraction block.

<sup>(3)</sup> Minimal q-values as Benjamini–Hochberg-adjusted p-values of FPKM comparisons of healthy donor, lung adenocarcinoma and lung squamous cell carcinoma patient blood samples (Cuffdiff).

<sup>(4)</sup> SNORD84 represented in the top list of invariable snoRNAs of three blood fractions (blood cells, plasma and 160,000 g pellets of blood plasma).



Table S9: Differentially distributed mRNA, lncRNAs, microRNAs and snoRNAs in blood cells, plasma and plasma fractions.

| Profile 1 <sup>(1)</sup> | Profile 2 <sup>(1)</sup> | Transcript ID        | FPKM1   | FPKM2 | log <sub>2</sub> | q <sup>(2)</sup> | Total Number <sup>(3)</sup><br>NM/miR/sno/others <sup>(4)</sup> |
|--------------------------|--------------------------|----------------------|---------|-------|------------------|------------------|-----------------------------------------------------------------|
| I. Blood cells           | II. Plasma               | RBBP8 <sup>(5)</sup> | 1.3E1   | 2.3E3 | 7.0              | 0.04             | 5<br>5/0/0/0                                                    |
|                          |                          | AURKAIP1             | 5.0E0   | 3.7E1 | 3.0              | 0.04             |                                                                 |
|                          |                          | IFNA7                | 3.0E0   | 1.7E1 | 2.0              | 0.04             |                                                                 |
|                          |                          | SNORD110             | 5.7E4   | 4.7E3 | -4.0             | 0.04             | 8<br>0/3/5/0                                                    |
|                          |                          | SNORA66              | 3.4E3   | 2.7E2 | -4.0             | 0.04             |                                                                 |
|                          |                          | MIR210               | 1.1E4   | 7.3E2 | -4.0             | 0.04             |                                                                 |
|                          | MIR3182                  | 4.2E3                | 1.6E5   | 5.2   | 0.04             |                  |                                                                 |
|                          | III. 16,000 g pellet     | MIR744               | 3.7E2   | 1.2E4 | 5.0              | 0.04             | 12<br>6/5/0/1                                                   |
|                          |                          | MIR10A               | 2.2E2   | 4.3E3 | 4.3              | 0.04             |                                                                 |
|                          |                          | SNORA8               | 3.5E3   | 1.5E2 | -4.5             | 0.04             |                                                                 |
|                          |                          | SNORA7A              | 3.1E3   | 1.3E2 | -4.6             | 0.04             | 39<br>8/2/23/6                                                  |
|                          |                          | SNORD94              | 4.4E3   | 1.2E2 | -5.2             | 0.04             |                                                                 |
|                          |                          | FAM187B              | 6.4E0   | 1.7E2 | 4.7              | 0.04             |                                                                 |
|                          | IV. 160,000 g pellet     | KCNIP4               | 6.4E0   | 1.0E2 | 4.0              | 0.04             | 76<br>68/1/0/7                                                  |
|                          |                          | C2orf7               | 6.3E0   | 7.9E1 | 3.7              | 0.04             |                                                                 |
|                          |                          | SNORD56              | 8.0E4   | 9.6E2 | -6.4             | 0.04             |                                                                 |
|                          |                          | SNORD65              | 5.5E4   | 6.4E2 | -6.4             | 0.04             | 82<br>7/18/49/8                                                 |
|                          |                          | SNORD110             | 5.7E4   | 6.7E2 | -6.4             | 0.04             |                                                                 |
|                          |                          | TMEM91               | 3.7E0   | 4.7E1 | 3.7              | 0.04             |                                                                 |
|                          | V. 160,000 g supernatant | MIR10A               | 2.2E2   | 2.4E3 | 3.4              | 0.04             | 28<br>24/1/0/3                                                  |
| OSTN                     |                          | 7.4E0                | 5.7E1   | 2.9   | 0.04             |                  |                                                                 |
| SNORD1B                  |                          | 7.8E3                | 5.0E2   | -4.0  | 0.04             |                  |                                                                 |
| SNORA31                  |                          | 3.5E3                | 1.8E2   | -4.3  | 0.04             | 18<br>6/1/9/2    |                                                                 |
| SNORD110                 |                          | 5.7E4                | 2.8E3   | -4.3  | 0.04             |                  |                                                                 |
| MIR421                   |                          | 1.4E3                | 2.0E4   | 3.8   | 0.04             |                  |                                                                 |
| II. Plasma               | III. 16,000 g pellet     | MIR139               | 3.2E3   | 3.6E4 | 3.5              | 0.04             | 4<br>0/4/0/0                                                    |
|                          |                          | MIR199B              | 1.5E3   | 1.5E4 | 3.2              | 0.04             |                                                                 |
|                          |                          | --                   | --      | --    | --               | 0                |                                                                 |
|                          |                          | IV. 160,000 g pellet | FAM187B | 1.4E1 | 1.7E2            | 3.6              | 0.04                                                            |
|                          | FAM185A                  |                      | 8.9E0   | 1.1E2 | 3.6              | 0.04             |                                                                 |
|                          | PRNP                     |                      | 3.1E0   | 2.5E1 | 3.0              | 0.04             |                                                                 |
|                          | C1D                      |                      | 3.2E1   | 2.5E0 | -3.7             | 0.04             | 11<br>9/0/2/0                                                   |
|                          | METT5D1                  |                      | 3.4E3   | 3.1E1 | -6.8             | 0.04             |                                                                 |
|                          | RBBP8                    |                      | 2.3E3   | 9.7E0 | -7.9             | 0.04             |                                                                 |
|                          | V. 160 000g supernatant  | TMEM91               | 5.4E0   | 4.0E1 | 2.9              | 0.04             | 5<br>3/1/0/1                                                    |
|                          |                          | FLJ41278             | 3.9E3   | 2.5E4 | 2.7              | 0.04             |                                                                 |
|                          |                          | MIR451               | 1.8E7   | 9.0E7 | 2.3              | 0.04             |                                                                 |
|                          |                          | --                   | --      | --    | --               | 0                |                                                                 |
| III. 16,000 g pellet     | IV. 160,000 g pellet     | MIR449B              | 6.7E2   | 1.1E4 | 4.0              | 0.04             | 22<br>17/1/2/2                                                  |
|                          |                          | RNU11                | 7.1E2   | 7.2E3 | 3.3              | 0.04             |                                                                 |
|                          |                          | KRTAP10-5            | 1.0E1   | 9.5E1 | 3.2              | 0.04             |                                                                 |
|                          |                          | SNORD110             | 1.7E4   | 6.7E2 | -4.6             | 0.04             | 33<br>2/21/9/1                                                  |
|                          |                          | MIR744               | 1.2E4   | 3.5E2 | -5.1             | 0.04             |                                                                 |
|                          |                          | SNORD96A             | 3.2E4   | 6.8E2 | -5.6             | 0.04             |                                                                 |
|                          | V. 160,000 g supernatant | SNORD94              | 1.2E2   | 1.4E3 | 3.5              | 0.04             | 7<br>4/1/2/0                                                    |
|                          |                          | SNORD38A             | 5.5E3   | 3.5E4 | 2.7              | 0.04             |                                                                 |
|                          |                          | CHI3L2               | 3.7E0   | 1.8E1 | 2.2              | 0.04             |                                                                 |
| MYL6                     | 7.4E1                    | 1.4E1                | -2.4    | 0.04  | 1<br>1/0/0/0     |                  |                                                                 |
| IV. 160,000 g pellet     | V. 160,000 g supernatant | C1D                  | 2.5E0   | 5.1E1 | 4.4              | 0.04             | 15<br>4/6/5/0                                                   |
|                          |                          | MIR4306              | 1.0E3   | 1.5E4 | 3.9              | 0.04             |                                                                 |
|                          |                          | SNORD20              | 7.1E2   | 9.0E3 | 3.7              | 0.04             |                                                                 |
|                          |                          | ATP5G2               | 3.8E1   | 6.5E0 | -2.6             | 0.04             | 13<br>12/0/0/1                                                  |
|                          |                          | ADAM29               | 2.3E1   | 3.4E0 | -2.8             | 0.04             |                                                                 |
|                          |                          | CELA2B               | 4.3E1   | 4.1E0 | -3.4             | 0.04             |                                                                 |

<sup>(1)</sup> Human RefSeq RNA profiles of blood fractions were compared with Cuffdiff (cutoff 100) and 3 most enriched as well as 3 most depleted RNA species for each pairs of comparisons represented.

<sup>(2)</sup> Benjamini–Hochberg adjusted *p*-values of blood fractions FPKM values comparisons (CuffDiff).

- (3) Total number of differentially distributed RefSeq RNAs for each block of enriched or depleted species.
- (4) Total number of mRNAs/microRNAs/snoRNAs/other ncRNAs (including lncRNAs) for each block of enriched or depleted species.
- (5) For mRNAs with multiple splice isoforms the most exerted isoform was selected by  $\log_2$  value of FPKM comparisons.

Table S10: Top invariable non-RefSeq RNAs of human blood fractions (fragments of pre-mRNA introns, lncRNAs and novel transcripts).

| I. Blood cells                                     |                     |                    | II. Plasma                         |       |       | III. 16,000 g pellet                               |       |       | III. 160,000 g pellet                             |       |       | V. 160,000 g supernatant                          |       |       |
|----------------------------------------------------|---------------------|--------------------|------------------------------------|-------|-------|----------------------------------------------------|-------|-------|---------------------------------------------------|-------|-------|---------------------------------------------------|-------|-------|
| Chr <sup>(1)</sup>                                 | FPKM <sup>(2)</sup> | Std <sup>(2)</sup> | Chr                                | FPKM  | Std   | Chr                                                | FPKM  | Std   | Chr                                               | FPKM  | Std   | Chr                                               | FPKM  | Std   |
| <a href="#">chr8[+]<u>112751238-12751281</u></a>   | 8.2E7               | 2.9E7              | chrX[+] <u>120612032-120612062</u> | 1.8E7 | 1.1E7 | chr4[+] <u>186518885-186518942</u>                 | 6.8E7 | 3.2E7 | chr2[-] <u>28688454-28688543</u>                  | 7.5E8 | 5.0E8 | chr7[+] <u>106008992-106009055</u>                | 1.9E8 | 1.2E8 |
| <a href="#">chr4[-]<u>190968942-190968967</u></a>  | 6.9E7               | 2.9E7              | chr1[-] <u>8053517-8053562</u>     | 1.7E7 | 4.4E6 | <a href="#">chr9[-]<u>131641128-131641163</u></a>  | 6.2E7 | 4.1E7 | chr13[-] <u>29401239-29401304</u>                 | 2.3E8 | 1.1E8 | chr10[-] <u>129916968-129917004</u>               | 1.9E8 | 1.3E8 |
| <a href="#">chr10[-]<u>135460779-135460804</u></a> | 6.4E7               | 2.6E7              | chr3[+] <u>857189-857263</u>       | 1.7E7 | 1.0E7 | chrX[-] <u>131244850-131244874</u>                 | 6.0E7 | 3.5E7 | chr19[-] <u>24187279-24187313</u>                 | 1.8E8 | 6.3E7 | <a href="#">chr8[-]<u>104001494-104001575</u></a> | 1.8E8 | 1.1E8 |
| chr2[-] <u>224644694-224644813</u>                 | 4.5E7               | 1.9E7              | chr7[+] <u>34253855-34253942</u>   | 1.6E7 | 8.9E6 | chrY[-] <u>24224242-24224292</u>                   | 5.5E7 | 8.0E6 | <a href="#">chr17[-]<u>3989516-3989581</u></a>    | 1.8E8 | 1.0E8 | chr12[+] <u>123449033-123449056</u>               | 1.6E8 | 6.1E7 |
| chr10[-] <u>60691390-60691418</u>                  | 4.3E7               | 2.5E7              | chr12[-] <u>5022311-5022331</u>    | 1.6E7 | 5.4E6 | chrY[-] <u>25833919-25833969</u>                   | 5.5E7 | 8.0E6 | chr4[+] <u>134994298-134994322</u>                | 1.6E8 | 3.9E7 | <a href="#">chr12[+]<u>78353818-78353840</u></a>  | 1.2E8 | 5.3E7 |
| chr1[-] <u>183949763-183949807</u>                 | 3.8E7               | 2.2E7              | chr20[-] <u>41004960-41005077</u>  | 1.2E7 | 4.8E6 | chr21[-] <u>24341920-24341947</u>                  | 4.6E7 | 1.7E7 | <a href="#">chr12[+]<u>78353818-78353840</u></a>  | 1.3E8 | 3.7E7 | chr5[-] <u>155785942-155785993</u>                | 9.2E7 | 5.3E7 |
| chr16[-] <u>16982934-16982961</u>                  | 3.6E7               | 1.4E7              | chr15[+] <u>58251879-58251992</u>  | 1.1E7 | 1.4E6 | chr6[-] <u>144210182-144210221</u>                 | 4.4E7 | 1.4E7 | chr18[-] <u>21707456-21707476</u>                 | 1.1E8 | 7.4E7 | chr12[-] <u>126701820-126701923</u>               | 9.0E7 | 3.9E7 |
| <a href="#">chr5[-]<u>74063376-74063516</u></a>    | 3.5E7               | 1.5E7              | chr1[-] <u>111708389-111708411</u> | 1.1E7 | 5.7E6 | chr9[+] <u>129123637-129123704</u>                 | 4.3E7 | 1.4E7 | chr1[-] <u>87222201-87222238</u>                  | 1.1E8 | 6.0E7 | chr6[+] <u>132015523-132015683</u>                | 8.7E7 | 1.1E7 |
| chr22[-] <u>36301696-36301718</u>                  | 3.4E7               | 1.6E7              | chr18[-] <u>7745099-7745133</u>    | 1.1E7 | 6.6E6 | chr3[-] <u>25177183-25177216</u>                   | 3.4E7 | 1.4E7 | <a href="#">chr16[-]<u>32696379-32696407</u></a>  | 1.1E8 | 6.8E7 | chr19[+] <u>45361161-45361250</u>                 | 7.7E7 | 4.7E7 |
| chr1[-] <u>215515108-215515196</u>                 | 3.2E7               | 1.3E7              | chr7[-] <u>65637753-65637775</u>   | 8.5E6 | 2.8E6 | chr7[-] <u>146153014-146153086</u>                 | 3.0E7 | 1.9E7 | chr13[+] <u>113415433-113415464</u>               | 1.1E8 | 2.7E7 | <a href="#">chr1[+]<u>193231400-193231565</u></a> | 6.3E7 | 4.1E7 |
| chr1[-] <u>97294603-97294682</u>                   | 3.1E7               | 2.1E7              | chr15[-] <u>54722229-54722333</u>  | 8.2E6 | 5.2E6 | <a href="#">chr8[+]<u>12751238-12751281</u></a>    | 3.0E7 | 1.8E7 | chr14[+] <u>53235829-53235849</u>                 | 1.0E8 | 6.3E7 | chr3[+] <u>137352004-137352055</u>                | 5.7E7 | 6.1E5 |
| chr3[-] <u>115194392-115194518</u>                 | 3.0E7               | 1.9E7              | chr7[-] <u>106045206-106045234</u> | 7.1E6 | 3.6E6 | <a href="#">chr4[-]<u>190968942-190968967</u></a>  | 3.0E7 | 1.2E7 | <a href="#">chr8[-]<u>104001494-104001575</u></a> | 8.9E7 | 2.6E7 | chr18[-] <u>74718233-74718260</u>                 | 5.6E7 | 3.4E7 |
| chr3[+] <u>69703070-69703090</u>                   | 2.9E7               | 1.5E7              | chr4[-] <u>145789285-145789371</u> | 6.7E6 | 3.0E6 | <a href="#">chr1[+]<u>193231400-193231565</u></a>  | 3.0E7 | 1.9E7 | chr3[-] <u>45713728-45713819</u>                  | 8.6E7 | 3.5E7 | chr4[+] <u>5320371-5320402</u>                    | 5.5E7 | 3.3E7 |
| chr3[+] <u>44188974-44189054</u>                   | 2.7E7               | 1.8E7              | chr7[-] <u>90757495-90757572</u>   | 6.6E6 | 4.2E6 | <a href="#">chr10[-]<u>135460779-135460804</u></a> | 3.0E7 | 1.2E7 | chr12[+] <u>90388361-90388432</u>                 | 8.6E7 | 3.2E7 | chr6[-] <u>108111274-108111294</u>                | 5.4E7 | 1.4E7 |
| chr6[+] <u>75775575-75775595</u>                   | 2.3E7               | 1.4E7              | chr1[+] <u>162406742-162406799</u> | 5.9E6 | 3.7E6 | chr1[-] <u>209056366-209056417</u>                 | 2.6E7 | 9.5E6 | chr11[-] <u>81934926-81935013</u>                 | 8.4E7 | 5.0E7 | chr1[-] <u>53369280-53369310</u>                  | 5.0E7 | 2.2E7 |
| chr11[+] <u>15314015-15314142</u>                  | 2.3E7               | 1.2E7              | chr1[-] <u>11189305-11189372</u>   | 5.7E6 | 7.2E5 | chr18[+] <u>13870664-13870696</u>                  | 2.6E7 | 1.7E7 | chr10[+] <u>36672457-36672544</u>                 | 8.1E7 | 5.2E7 | chr2[-] <u>118804188-118804241</u>                | 4.7E7 | 1.9E7 |
| chr4[-] <u>190591958-190592030</u>                 | 2.2E7               | 1.3E7              | chr4[-] <u>177405455-177405515</u> | 5.6E6 | 3.2E6 | chrX[+] <u>134761028-134761050</u>                 | 2.5E7 | 1.3E7 | <a href="#">chr5[-]<u>74063376-74063516</u></a>   | 8.1E7 | 4.3E7 | chr5[-] <u>22102694-22102725</u>                  | 4.6E7 | 1.9E7 |
| chr7[+] <u>95709490-95709583</u>                   | 2.2E7               | 9.6E6              | chr9[-] <u>22206042-22206161</u>   | 5.5E6 | 2.1E6 | chr21[-] <u>32489655-32489703</u>                  | 2.2E7 | 1.4E7 | chr7[-] <u>42618945-42619083</u>                  | 7.6E7 | 1.8E7 | <a href="#">chr17[-]<u>3989516-3989581</u></a>    | 4.1E7 | 2.4E7 |
| chrY[+] <u>8231760-8231792</u>                     | 1.9E7               | 9.5E6              | chr9[-] <u>109601236-109601333</u> | 5.5E6 | 1.9E6 | chr10[-] <u>89537898-89537924</u>                  | 2.2E7 | 1.4E7 | chr3[-] <u>111399254-111399276</u>                | 7.5E7 | 4.1E7 | <a href="#">chr9[-]<u>131641128-131641163</u></a> | 3.8E7 | 1.9E7 |
| chr11[+] <u>4499105-4499138</u>                    | 1.9E7               | 1.3E7              | chr8[+] <u>83366132-83366300</u>   | 5.3E6 | 3.0E6 | chr13[-] <u>40708839-40708878</u>                  | 2.0E7 | 1.0E7 | chr7[-] <u>127077302-127077369</u>                | 7.2E7 | 4.0E7 | <a href="#">chr16[-]<u>32696379-32696407</u></a>  | 3.8E7 | 8.7E6 |

- (1) Non-RefSeq RNA fragments selected as the top 20 by mean FPKM value, filtered with FPKM to Std ratio  $> 1.5$ , within a particular blood fraction.
- (2) Mean FPKM values and standard deviation (Std) of mean FPKM values of blood samples obtained from healthy donors, lung adenocarcinoma and lung squamous cell carcinoma patients. Data are sorted in descending order by mean FPKM within each blood fraction block.

Table S11: Top differentially expressed transcripts of blood fractions of lung squamous cell carcinoma patients.

| Fraction             | Regulation | Transcript ID       | FPKM1 <sup>(1)</sup><br>H | FPKM2 <sup>(1)</sup><br>LSCC | log <sub>2</sub> | q <sup>(2)</sup> | Total Number <sup>(3)</sup><br>NM/miR/sno/others <sup>(4)</sup> |
|----------------------|------------|---------------------|---------------------------|------------------------------|------------------|------------------|-----------------------------------------------------------------|
| I. Blood cells       | Up         | MIR214              | 4.4E2                     | 1.3E4                        | 4.9              | 0.050            | 38<br>29/7/0/1                                                  |
|                      |            | MIR766              | 6.8E2                     | 1.5E4                        | 4.4              | 0.020            |                                                                 |
|                      |            | MRPS33              | 9.1E0                     | 1.3E2                        | 3.9              | 0.048            |                                                                 |
|                      |            | MIB2<br>NR_033183   | 2.0E0                     | 2.7E1                        | 3.8              | 0.013            |                                                                 |
|                      |            | SNCB <sup>(5)</sup> | 5.5E0                     | 7.6E1                        | 3.8              | 0.038            |                                                                 |
|                      |            | NIT1                | 3.1E0                     | 3.7E1                        | 3.6              | 0.043            |                                                                 |
|                      |            | TRAPPC2L            | 7.4E0                     | 8.9E1                        | 3.6              | 0.040            |                                                                 |
|                      |            | ARHGAP11B           | 3.5E0                     | 3.9E1                        | 3.5              | 0.040            |                                                                 |
|                      |            | HCFC1R1             | 5.4E0                     | 6.0E1                        | 3.5              | 0.036            |                                                                 |
|                      | MIR197     | 4.4E3               | 4.7E4                     | 3.4                          | 0.043            |                  |                                                                 |
|                      | Down       | IFNA17              | 5.9E1                     | 3.3E0                        | -4.2             | 0.032            | 97<br>27/21/40/9                                                |
|                      |            | SNORD82             | 4.8E4                     | 2.3E3                        | -4.4             | 0.032            |                                                                 |
|                      |            | SNORD42A            | 1.2E5                     | 5.5E3                        | -4.4             | 0.040            |                                                                 |
|                      |            | IFNA10              | 6.2E1                     | 2.7E0                        | -4.5             | 0.027            |                                                                 |
|                      |            | RPL17               | 1.8E2                     | 7.7E0                        | -4.5             | 0.040            |                                                                 |
|                      |            | C17orf91            | 1.0E2                     | 3.6E0                        | -4.8             | 0.035            |                                                                 |
|                      |            | SNORA31             | 8.9E3                     | 2.6E2                        | -5.1             | 0.044            |                                                                 |
|                      |            | SCARNA9             | 4.7E2                     | 1.2E1                        | -5.3             | 0.046            |                                                                 |
| MIR106A              |            | 5.6E4               | 1.3E3                     | -5.4                         | 0.044            |                  |                                                                 |
| C17orf91             | 1.1E2      | 2.4E0               | -5.5                      | 0.032                        |                  |                  |                                                                 |
| II. Plasma           | Up         | SLAMF9              | 7.0E0                     | 5.0E1                        | 2.8              | 0.038            | 15<br>10/2/1/2                                                  |
|                      |            | TBC1D17             | 6.9E0                     | 3.2E1                        | 2.2              | 0.028            |                                                                 |
|                      |            | OVCA2               | 1.2E1                     | 5.1E1                        | 2.1              | 0.025            |                                                                 |
|                      |            | SSBP4               | 6.4E0                     | 2.7E1                        | 2.1              | 0.029            |                                                                 |
|                      |            | CCNB3               | 8.5E0                     | 3.5E1                        | 2.0              | 0.045            |                                                                 |
|                      |            | ACSM3               | 1.0E1                     | 4.0E1                        | 2.0              | 0.035            |                                                                 |
|                      |            | GIMAP5              | 1.1E1                     | 4.6E1                        | 2.0              | 0.048            |                                                                 |
|                      | LOC285074  | 7.9E0               | 2.7E1                     | 1.8                          | 0.039            |                  |                                                                 |
|                      | Down       | MIR26B              | 4.2E4                     | 1.9E3                        | -4.5             | 0.039            | 147<br>96/23/5/23                                               |
|                      |            | MIR29B2             | 4.5E4                     | 1.9E3                        | -4.5             | 0.033            |                                                                 |
|                      |            | MIR17               | 1.0E5                     | 4.0E3                        | -4.7             | 0.019            |                                                                 |
|                      |            | MIR25               | 4.4E4                     | 1.7E3                        | -4.7             | 0.033            |                                                                 |
|                      |            | NPY                 | 4.2E2                     | 1.3E1                        | -5.0             | 0.025            |                                                                 |
|                      |            | MIR15B              | 6.2E4                     | 1.8E3                        | -5.1             | 0.009            |                                                                 |
|                      |            | MIR101-2            | 6.5E4                     | 1.7E3                        | -5.2             | 0.035            |                                                                 |
| SNORD34              |            | 2.4E5               | 3.3E3                     | -6.2                         | 0.032            |                  |                                                                 |
| MIR15A               | 1.2E5      | 1.5E3               | -6.3                      | 0.041                        |                  |                  |                                                                 |
| MIR451               | 1.6E7      | 1.6E5               | -6.7                      | 0.009                        |                  |                  |                                                                 |
| III. 16,000 g pellet | Up         | SLC26A5             | 4.5E0                     | 7.4E1                        | 4.0              | 0.004            | 94<br>54/24/3/13                                                |
|                      |            | LOC340357           | 9.6E0                     | 1.0E2                        | 3.4              | 0.004            |                                                                 |
|                      |            | MIR620              | 1.2E3                     | 1.1E4                        | 3.2              | 0.032            |                                                                 |
|                      |            | KDM4C               | 6.1E0                     | 5.2E1                        | 3.1              | 0.029            |                                                                 |
|                      |            | LOC284412           | 8.1E0                     | 6.8E1                        | 3.1              | 0.024            |                                                                 |
|                      |            | MIR421              | 3.5E3                     | 2.9E4                        | 3.0              | 0.005            |                                                                 |
|                      |            | RAB4B               | 1.5E1                     | 1.0E2                        | 2.8              | 0.010            |                                                                 |
|                      |            | TXNDC11             | 8.0E0                     | 5.5E1                        | 2.8              | 0.028            |                                                                 |
|                      |            | CCNB3               | 9.0E0                     | 6.1E1                        | 2.8              | 0.004            |                                                                 |
|                      | IL18       | 5.8E0               | 3.9E1                     | 2.7                          | 0.017            |                  |                                                                 |
|                      | Down       | VTRNA1-2            | 2.6E4                     | 2.1E3                        | -3.6             | 0.013            | 273<br>221/14/7/31                                              |
|                      |            | MIR144              | 6.3E4                     | 4.9E3                        | -3.7             | 0.004            |                                                                 |
|                      |            | MIRLET7A3           | 1.6E5                     | 1.2E4                        | -3.7             | 0.013            |                                                                 |
|                      |            | NCRNA00173          | 2.0E2                     | 1.4E1                        | -3.8             | 0.016            |                                                                 |
|                      |            | SF1                 | 4.2E1                     | 2.8E0                        | -3.9             | 0.004            |                                                                 |

| Fraction                        | Regulation  | Transcript ID | FPKM1 <sup>(1)</sup><br>H | FPKM2 <sup>(1)</sup><br>LSCC | log <sub>2</sub>   | q <sup>(2)</sup> | Total Number <sup>(3)</sup><br>NM/miR/sno/others <sup>(4)</sup> |
|---------------------------------|-------------|---------------|---------------------------|------------------------------|--------------------|------------------|-----------------------------------------------------------------|
|                                 |             | NCRNA00114    | 1.7E2                     | 1.1E1                        | -3.9               | 0.010            |                                                                 |
|                                 |             | SNORD31       | 1.6E5                     | 9.7E3                        | -4.0               | 0.004            |                                                                 |
|                                 |             | CGB1          | 2.0E2                     | 1.1E1                        | -4.1               | 0.004            |                                                                 |
|                                 |             | RPL9          | 5.2E2                     | 2.9E1                        | -4.2               | 0.046            |                                                                 |
|                                 |             | CSN3          | 2.9E2                     | 1.4E1                        | -4.3               | 0.004            |                                                                 |
| <b>V. 160,000 g supernatant</b> | <b>Up</b>   | MIR524        | 0.0E0                     | 5.2E4                        | n/d <sup>(6)</sup> | 0.028            | 1<br>0/1/0/0                                                    |
|                                 | <b>Down</b> | EPPK1         | 1.4E3                     | 1.3E1                        | -6.8               | 0.028            | 13<br>1/3/9/0                                                   |
|                                 |             | MIR1306       | 2.0E3                     | 0.0E0                        | n/d                | 0.028            |                                                                 |
|                                 |             | SNORD103B     | 3.7E3                     | 0.0E0                        | n/d                | 0.028            |                                                                 |
|                                 |             | SNORD49A      | 5.5E3                     | 0.0E0                        | n/d                | 0.028            |                                                                 |
|                                 |             | SNORD36C      | 7.6E3                     | 0.0E0                        | n/d                | 0.028            |                                                                 |
|                                 |             | MIR369        | 1.3E4                     | 0.0E0                        | n/d                | 0.028            |                                                                 |
|                                 |             | SNORD28       | 1.3E4                     | 0.0E0                        | n/d                | 0.028            |                                                                 |
|                                 |             | MIR3182       | 3.1E4                     | 0.0E0                        | n/d                | 0.028            |                                                                 |
| SNORD48                         | 4.8E4       | 0.0E0         | n/d                       | 0.028                        |                    |                  |                                                                 |

<sup>(1)</sup> Human RNA profiles of healthy donors and patients with lung squamous cells carcinoma were compared fraction by fractions with Cuffdiff (cutoff 100). The most up regulated as well as the most down regulated RNA species for each pairs of comparisons are represented. Data sorted by log<sub>2</sub> in descending or ascending order for up or down regulated transcripts, respectively.

<sup>(2)</sup> Benjamini–Hochberg adjusted p-values of blood fractions FPKM values comparisons (CuffDiff). Benjamini–Hochberg-adjusted p-values of blood fractions FPKM values comparisons of healthy donor and lung adenocarcinoma patient blood fractions (Cuffdiff).

<sup>(3)</sup> Total number of differentially regulated RNAs for each block of up or down regulated species.

<sup>(4)</sup> Total number of mRNAs/microRNAs/snoRNAs/other ncRNAs (including lncRNAs, mtRNA, transcribed genome repeats rRNAs, tRNAs, U snRNAs, Y scRNAs) for each block of up or down regulated species.

<sup>(5)</sup> For mRNAs with multiple splice isoforms the most exerted isoform was selected by log<sub>2</sub> value of FPKM comparisons.

<sup>(6)</sup> For zero FPKM value in one of the compared fraction log<sub>2</sub> value not determined (n/d). The data sorted by non zero FPKM value.

Table S12: Top differentially expressed transcripts of blood fractions of lung adenocarcinoma patients.

| Fraction                  | Regulation | Transcript ID         | FPKM1 <sup>(1)</sup><br>H | FPKM2 <sup>(1)</sup><br>LSCC | log <sub>2</sub>   | q <sup>(2)</sup> | Total Number <sup>(3)</sup><br>NM/miR/sno/others <sup>(4)</sup> |
|---------------------------|------------|-----------------------|---------------------------|------------------------------|--------------------|------------------|-----------------------------------------------------------------|
| I. Blood cells            | Up         | MIR517A               | 0.0E0                     | 3.6E3                        | n/d <sup>(5)</sup> | 0.020            | 1<br>0/1/0/0                                                    |
|                           | Down       | CCL24 <sup>(6)</sup>  | 5.8E1                     | 0.0E0                        | n/d                | 0.020            | 10<br>1/3/5/1                                                   |
|                           |            | SNORA49               | 1.1E3                     | 0.0E0                        | n/d                | 0.020            |                                                                 |
|                           |            | SNORD116-24           | 1.4E3                     | 0.0E0                        | n/d                | 0.020            |                                                                 |
|                           |            | SNORD72               | 6.4E3                     | 0.0E0                        | n/d                | 0.020            |                                                                 |
|                           |            | MIR301B               | 7.5E3                     | 0.0E0                        | n/d                | 0.020            |                                                                 |
|                           |            | MIRLET7E              | 9.2E3                     | 0.0E0                        | n/d                | 0.020            |                                                                 |
|                           |            | SNORD78               | 1.0E4                     | 0.0E0                        | n/d                | 0.020            |                                                                 |
|                           |            | MIR32                 | 6.4E4                     | 0.0E0                        | n/d                | 0.020            |                                                                 |
| TRNR <sup>(7)</sup>       | 1.0E7      | 1.8E5                 | -5.7                      | 0.002                        |                    |                  |                                                                 |
| II. Plasma                | Up         | MIR296                | 0.0E0                     | 6.9E3                        | n/d                | 0.006            | 2<br>1/1/0/0                                                    |
|                           |            | METT5D1               | 3.4E1                     | 8.3E3                        | 7.9                | 0.041            |                                                                 |
|                           | Down       | TRND <sup>(7)</sup>   | 3.0E5                     | 0.0E0                        | n/d                | 0.027            | 61<br>17/3/26/15                                                |
|                           |            | VTRNA1-1              | 5.3E4                     | 0.0E0                        | n/d                | 0.006            |                                                                 |
|                           |            | SNORD81               | 5.2E4                     | 0.0E0                        | n/d                | 0.018            |                                                                 |
|                           |            | SNORD38B              | 3.2E4                     | 0.0E0                        | n/d                | 0.006            |                                                                 |
|                           |            | SNORD75               | 3.1E4                     | 0.0E0                        | n/d                | 0.008            |                                                                 |
|                           |            | MIR3607               | 2.9E4                     | 0.0E0                        | n/d                | 0.008            |                                                                 |
|                           |            | MIR3182               | 2.7E4                     | 0.0E0                        | n/d                | 0.006            |                                                                 |
|                           |            | SNORD73A              | 2.7E4                     | 0.0E0                        | n/d                | 0.016            |                                                                 |
|                           |            | SNORD2                | 2.4E4                     | 0.0E0                        | n/d                | 0.006            |                                                                 |
|                           |            | SNORD38A              | 1.8E4                     | 0.0E0                        | n/d                | 0.006            |                                                                 |
|                           |            | SNORD58B              | 1.8E4                     | 0.0E0                        | n/d                | 0.006            |                                                                 |
| III. 16,000 g pellet      | Up         | MIR194-1              | 0.0E0                     | 1.1E4                        | n/d                | 0.029            | 4<br>0/3/0/3                                                    |
|                           |            | MIR933                | 0.0E0                     | 2.1E4                        | n/d                | 0.029            |                                                                 |
|                           |            | MIR4270               | 0.0E0                     | 4.4E4                        | n/d                | 0.029            |                                                                 |
|                           |            | D-loop <sup>(7)</sup> | 4.5E2                     | 1.2E4                        | 4.7                | 0.006            |                                                                 |
|                           | Down       | RPS15A                | 4.7E1                     | 0.0E0                        | n/d                | 0.046            | 4<br>1/1/0/2                                                    |
|                           |            | AluYc1                | 1.0E4                     | 0.0E0                        | n/d                | 0.008            |                                                                 |
|                           |            | MIR4320               | 1.2E4                     | 0.0E0                        | n/d                | 0.029            |                                                                 |
|                           |            | HSATII <sup>(8)</sup> | 1.6E5                     | 0.0E0                        | n/d                | 0.008            |                                                                 |
| IV. 160,000 g pellet      | Up         | SNORD113              | 0.0E0                     | 2.7E3                        | n/d                | 0.041            | 4<br>0/1/2/1                                                    |
|                           |            | SNORD78               | 0.0E0                     | 1.2E4                        | n/d                | 0.041            |                                                                 |
|                           |            | MIR520A               | 0.0E0                     | 2.5E3                        | n/d                | 0.041            |                                                                 |
|                           |            | D-loop <sup>(7)</sup> | 5.6E2                     | 5.9E3                        | 3.4                | 0.049            |                                                                 |
|                           | Down       | DEFB109P1             | 2.0E2                     | 0.0E0                        | n/d                | 0.019            | 12<br>1/7/2/2                                                   |
|                           |            | SNORA33               | 1.4E3                     | 0.0E0                        | n/d                | 0.019            |                                                                 |
|                           |            | SNORD1B               | 2.8E3                     | 0.0E0                        | n/d                | 0.019            |                                                                 |
|                           |            | MIR596                | 2.8E3                     | 0.0E0                        | n/d                | 0.035            |                                                                 |
|                           |            | MIR3154               | 4.6E3                     | 0.0E0                        | n/d                | 0.019            |                                                                 |
|                           |            | MIR134                | 5.4E3                     | 0.0E0                        | n/d                | 0.019            |                                                                 |
|                           |            | MIR3124               | 6.9E3                     | 0.0E0                        | n/d                | 0.019            |                                                                 |
|                           |            | MIR510                | 9.7E3                     | 0.0E0                        | n/d                | 0.019            |                                                                 |
|                           |            | MIR409                | 9.8E3                     | 0.0E0                        | n/d                | 0.019            |                                                                 |
|                           |            | MIR449B               | 3.8E4                     | 0.0E0                        | n/d                | 0.019            |                                                                 |
| c_tRNA-Pro <sup>(8)</sup> | 4.0E5      | 0.0E0                 | n/d                       | 0.016                        |                    |                  |                                                                 |
| V. 160,000 g supernatant  | Up         | SNORD113              | 0.0E0                     | 2.4E3                        | n/d                | 0.035            | 5<br>0/3/1/1                                                    |
|                           |            | MIR598                | 0.0E0                     | 1.2E3                        | n/d                | 0.020            |                                                                 |
|                           |            | MIR642A               | 0.0E0                     | 1.2E3                        | n/d                | 0.020            |                                                                 |
|                           |            | MIR1301               | 0.0E0                     | 2.6E3                        | n/d                | 0.009            |                                                                 |
|                           |            | FLJ41278              | 3.1E1                     | 5.3E4                        | 10.7               | 0.04             |                                                                 |
|                           | Down       | MIR374C               | 9.5E3                     | 0.0E0                        | n/d                | 0.009            | 69<br>7/19/37/6                                                 |
|                           |            | SNORD50A              | 9.6E3                     | 0.0E0                        | n/d                | 0.005            |                                                                 |
|                           |            | SNORD18A              | 1.0E4                     | 0.0E0                        | n/d                | 0.012            |                                                                 |
|                           |            | MIR409                | 1.3E4                     | 0.0E0                        | n/d                | 0.005            |                                                                 |

| Fraction | Regulation | Transcript ID       | FPKM1 <sup>(1)</sup><br>H | FPKM2 <sup>(1)</sup><br>LSCC | log <sub>2</sub> | q <sup>(2)</sup> | Total Number <sup>(3)</sup><br>NM/miR/sno/others <sup>(4)</sup> |
|----------|------------|---------------------|---------------------------|------------------------------|------------------|------------------|-----------------------------------------------------------------|
|          |            | MIR376C             | 1.3E4                     | 0.0E0                        | n/d              | 0.005            |                                                                 |
|          |            | SNORD59B            | 2.0E4                     | 0.0E0                        | n/d              | 0.005            |                                                                 |
|          |            | SNORD48             | 2.6E4                     | 0.0E0                        | n/d              | 0.005            |                                                                 |
|          |            | SNORD81             | 4.9E4                     | 0.0E0                        | n/d              | 0.012            |                                                                 |
|          |            | SNORD29             | 5.9E4                     | 0.0E0                        | n/d              | 0.005            |                                                                 |
|          |            | TRND <sup>(7)</sup> | 1.3E6                     | 0.0E0                        | n/d              | 0.021            |                                                                 |

<sup>(1)</sup> Human RNA profiles of healthy donors and patients with lung adenocarcinoma were compared fraction by fractions with Cuffdiff (cutoff 100). The most up regulated as well as the most down regulated RNA species for each pairs of comparisons are represented. Data sorted by log<sub>2</sub> in descending or ascending order for up or down regulated transcripts, respectively.

<sup>(2)</sup> Benjamini–Hochberg adjusted *p*-values of blood fractions FPKM values comparisons (CuffDiff). Benjamini–Hochberg-adjusted *p*-values of blood fractions FPKM values comparisons of healthy donor and lung adenocarcinoma patient blood fractions (Cuffdiff).

<sup>(3)</sup> Total number of differentially regulated RNAs for each block of up or down regulated species.

<sup>(4)</sup> Total number of mRNAs/microRNAs/snoRNAs/other ncRNAs (including lncRNAs, mtRNA, transcribed genome repeats rRNAs, tRNAs, U snRNAs, Y scRNAs) for the each block of up or down regulated species.

<sup>(5)</sup> For zero FPKM value in one of the compared fraction log<sub>2</sub> value not determined (n/d). The data sorted by non zero FPKM value.

<sup>(6)</sup> For mRNAs with multiple splice isoforms the most exerted isoform was selected by log<sub>2</sub> value of FPKM comparisons.

<sup>(7)</sup> Mitochondrial transcripts.

<sup>(8)</sup> Transcribed genome repeats.
